# Supplementary material for: Synthesis of thermally stable Ag@TiO2 core–shell nanoprisms and plasmon–enhanced optical properties for a P3HT thin film
Source: Royal Society of Chemistry journal article supplement (doi:10.1039/c3ra22918a), 2013-01-01
Supplement: c3ra22918a.pdf [file c3ra22918a.pdf]

## Electronic Supplementary Information

### Synthesis of Thermal Stable Ag@TiO<sub>2</sub> Core-Shell Nanoprisms and Plasmon-Enhanced Optical Properties for P3HT Thin Film

Peng Du,<sup>a,c</sup> Yinghui Cao,<sup>b</sup> Di Li,<sup>a</sup> Zhenyu Liu,<sup>b</sup> Xianggui Kong<sup>a</sup> and Zaicheng Sun<sup>a\*</sup>

<sup>a</sup>State Key Laboratory of Luminescence and Applications, Changchun Institute of Optics, Fine Mechanics and Physics, Chinese Academy of Sciences,  
3888 East Nanhu Road, Changchun, Jilin 130033 P. R. China,  
E-mail: [sunzc@ciomp.ac.cn](mailto:sunzc@ciomp.ac.cn)

<sup>b</sup>State Key Laboratory of Applied Optics, Changchun Institute of Optics, Fine Mechanics and Physics, Chinese Academy of Sciences,

<sup>c</sup>Graduate University of Chinese Academy of Science, 19A Yuquanlu, Beijing, 100049, P. R. China.

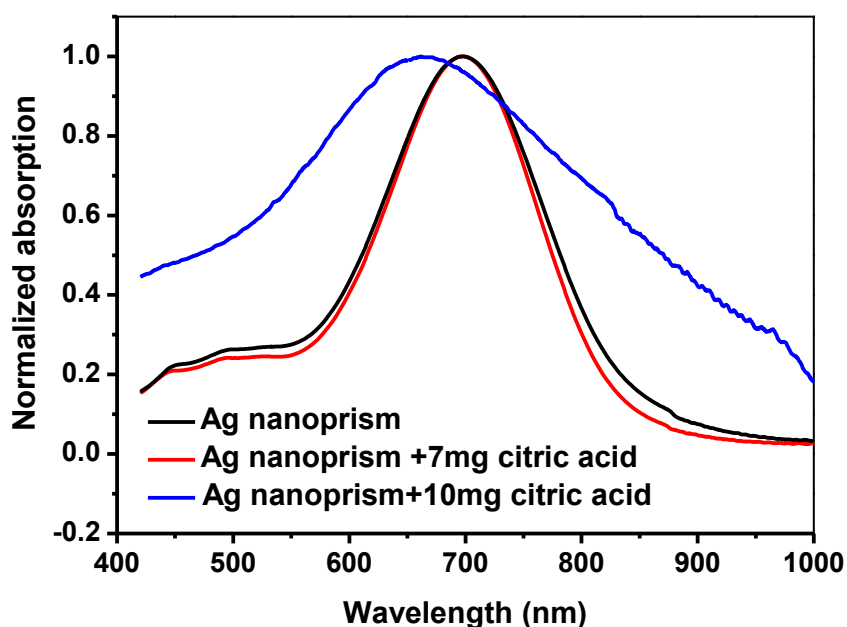

**Fig. S1** Normalized absorption spectra of 1ml of Ag NPs ethanol solution with different amount of citric acid.

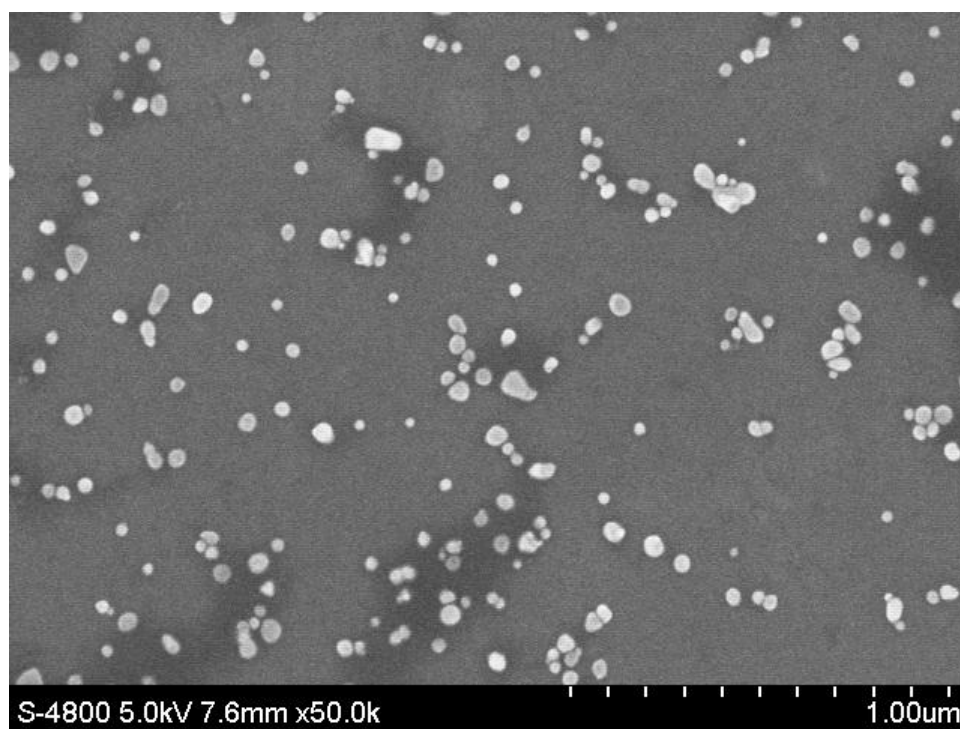

**Fig. S2** SEM image of 1ml of Ag NPs in ethanol with addition of 10 mg citric acid

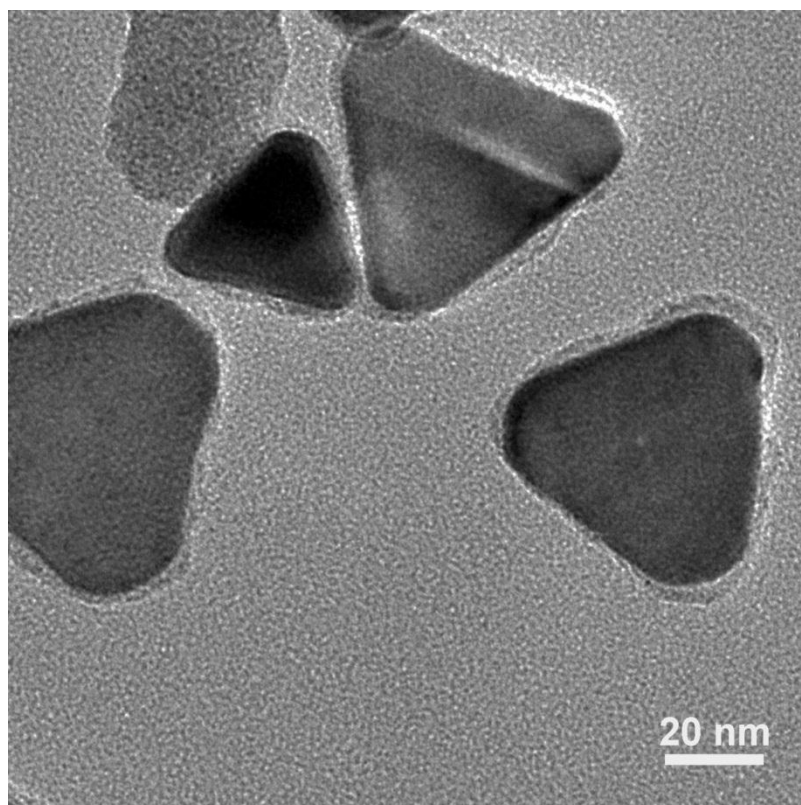

**Fig. S3** TEM image of Ag@TiO<sub>2</sub> core-shell NPs obtained from 10uL TiO<sub>2</sub> sol-gel precursor for 15min.

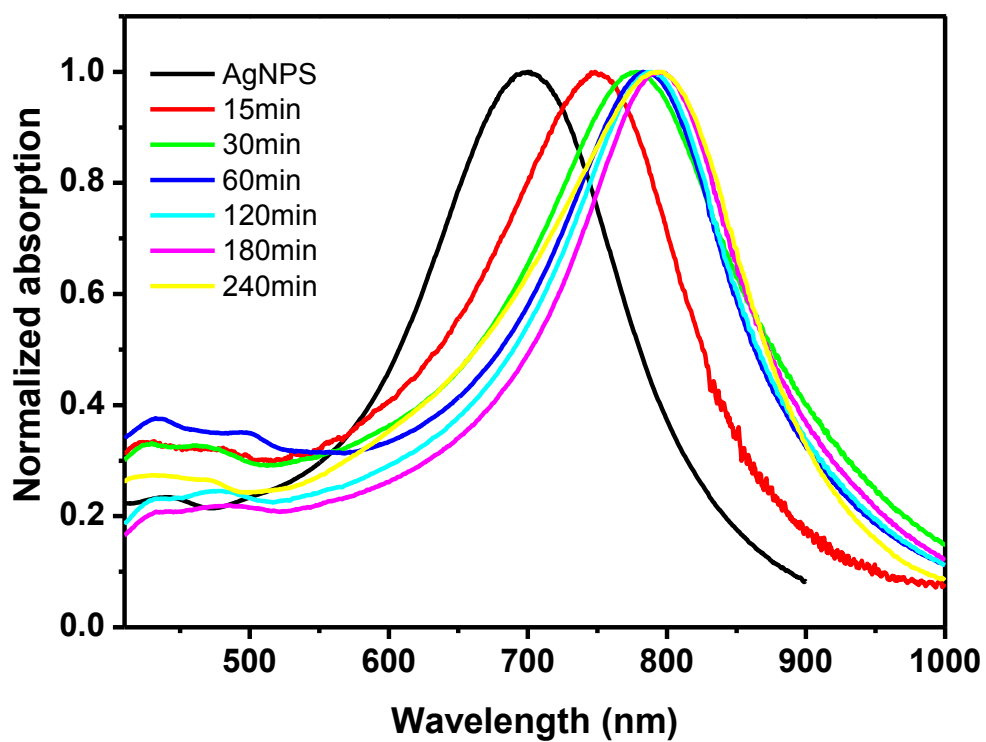

**Fig. S4** Normalized absorption spectra of Ag NPs coated with TiO<sub>2</sub> shell obtained from 10uL TiO<sub>2</sub> sol-gel precursor for different reaction time.

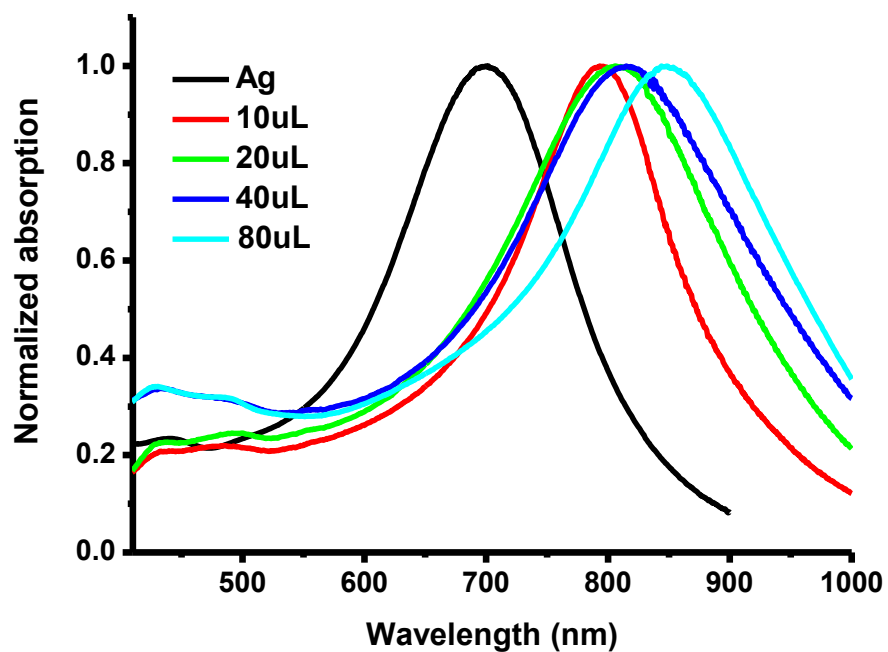

**Fig. S5** Normalized absorption spectra of Ag NPs coated with TiO<sub>2</sub> shell obtained from different amount of TiO<sub>2</sub> sol-gel precursor for 180 min reaction time.

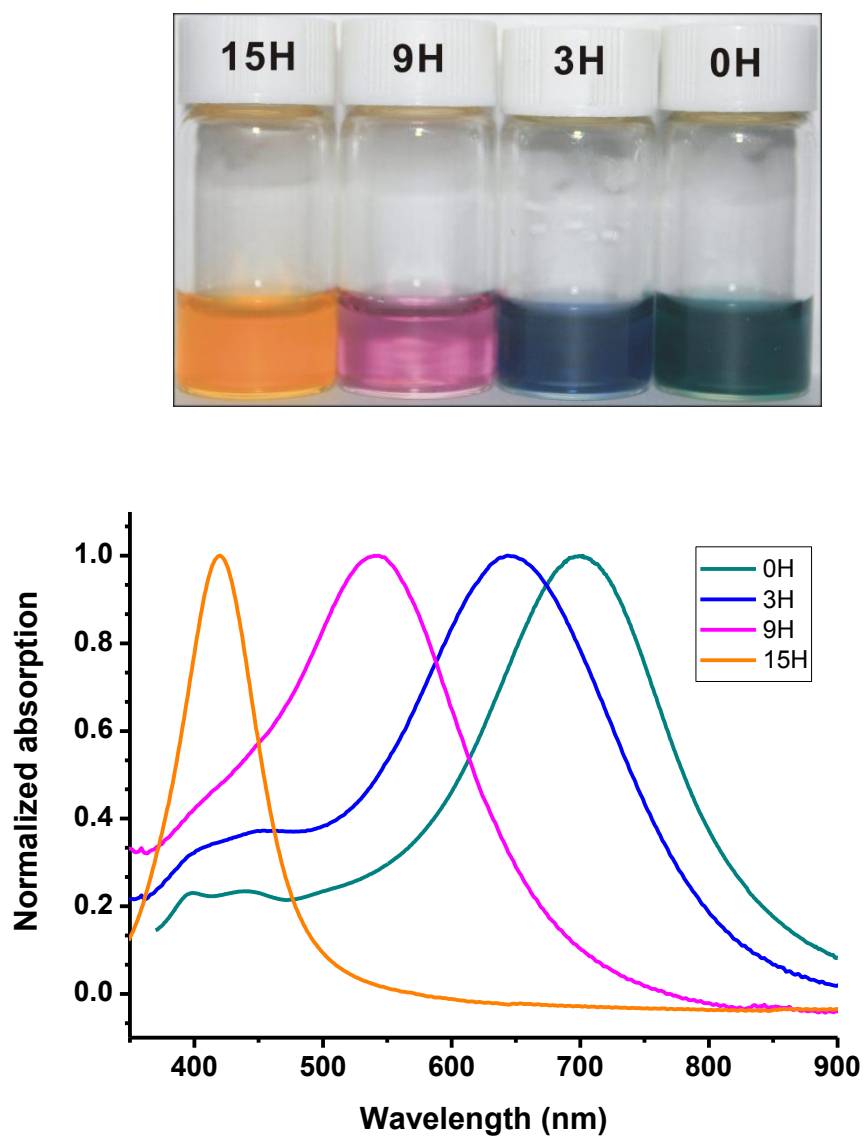

**Fig. S6** (Top) Photograph of the samples after they had been subjected to aging at 70 °C in oven for different periods. (Bottom) UV-Vis absorption spectra taken from the corresponding samples shown in top.

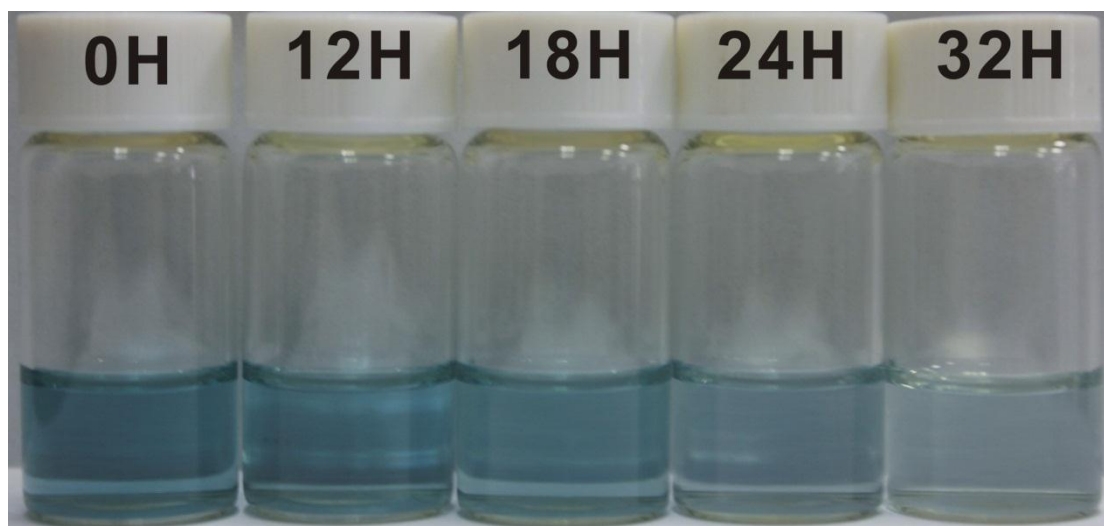

**Fig. S7** Photograph of the Ag@TiO<sub>2</sub> samples after they had been subjected to aging at 70 °C in oven for different periods of time (marked on the image).

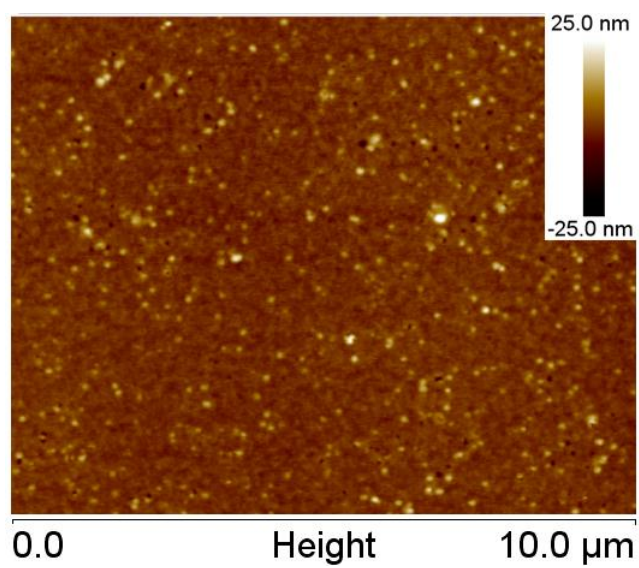

**Fig. S8** AFM images of P3HT coated Ag @ TiO<sub>2</sub> NPs on the bare glass substrate.
